# Supplementary material for: Inhibition of RPS6K reveals context-dependent Akt activity in luminal breast cancer cells
Source: PubMed Central journal article supplement (PMC8277016; doi:10.1371/journal.pcbi.1009125), 2021-06-30
Supplement: pcbi.1009125.s019.pdf [file pcbi.1009125.s019.pdf]

# 1 Model Summary

The model has 38 species and 50 reactions.

## 2 Species

|          |   |                         |
|----------|---|-------------------------|
| $x_1$    | = | <i>IGF1</i>             |
| $x_2$    | = | <i>Insulin</i>          |
| $x_3$    | = | <i>IGF1R</i>            |
| $x_4$    | = | <i>InsR</i>             |
| $x_5$    | = | <i>IRS</i>              |
| $x_6$    | = | <i>SOS</i>              |
| $x_7$    | = | <i>Ras</i>              |
| $x_8$    | = | <i>Raf</i>              |
| $x_9$    | = | <i>MEK</i>              |
| $x_{10}$ | = | <i>PI3K</i>             |
| $x_{11}$ | = | <i>PDK1</i>             |
| $x_{12}$ | = | <i>TSC2</i>             |
| $x_{13}$ | = | <i>mTOR</i>             |
| $x_{14}$ | = | <i>Akt</i>              |
| $x_{15}$ | = | <i>RPS6K</i>            |
| $x_{16}$ | = | <i>ERK</i>              |
| $x_{17}$ | = | <i>IGF1 – IGF1R</i>     |
| $x_{18}$ | = | <i>Ins – InsR</i>       |
| $x_{19}$ | = | <i>IGF1 – pIGF1R</i>    |
| $x_{20}$ | = | <i>Ins – pInsR</i>      |
| $x_{21}$ | = | <i>pIRS</i>             |
| $x_{22}$ | = | <i>aSOS</i>             |
| $x_{23}$ | = | <i>IGF1 – pIGF1Rint</i> |
| $x_{24}$ | = | <i>Ins – pInsRint</i>   |
| $x_{25}$ | = | <i>aRas</i>             |
| $x_{26}$ | = | <i>aPI3K</i>            |
| $x_{27}$ | = | <i>pRaf</i>             |
| $x_{28}$ | = | <i>aPDK1</i>            |
| $x_{29}$ | = | <i>pMEK</i>             |
| $x_{30}$ | = | <i>pAkt</i>             |
| $x_{31}$ | = | <i>pERK</i>             |

$$\begin{aligned}
x_{32} &= pTSC2 \\
x_{33} &= iRaf \\
x_{34} &= iIRS \\
x_{35} &= mTORact \\
x_{36} &= iSOS \\
x_{37} &= iMEK \\
x_{38} &= pRPS6K
\end{aligned}$$

### 3 Differential Equations

$$\begin{aligned}
\dot{x}_1 &= -kf_{1a}x_1x_3 + kf_{1b}x_{17} \\
\dot{x}_2 &= -kf_{2a}x_2x_4 + kf_{2b}x_{18} \\
\dot{x}_3 &= -kf_{1a}x_1x_3 + kf_{1b}x_{17} + kf_{402}x_{23} \\
\dot{x}_4 &= -kf_{2a}x_2x_4 + kf_{2b}x_{18} + kf_{404}x_{24} \\
\dot{x}_5 &= -kf_3x_{19}x_5 - kf_4x_{20}x_5 + kf_{101}x_{21} - kf_{208}x_{30}x_5 \\
&\quad - kf_{206}x_{31}x_5 + kf_{301}x_{34} - kf_{203}x_{38}x_5 \\
\dot{x}_6 &= -kf_5x_{19}x_6 - kf_6x_{20}x_6 - kf_7x_{21}x_6 + kf_{102}x_{22} \\
&\quad - kf_{201}x_{31}x_6 + kf_{302}x_{36} \\
\dot{x}_7 &= -kf_8x_{22}x_7 + kf_{103}x_{25} \\
\dot{x}_8 &= -kf_9x_{25}x_8 + kf_{104}x_{27} - kf_{204}x_{30}x_8 + kf_{303}x_{33} \\
\dot{x}_9 &= -kf_{10}x_{27}x_9 + kf_{105}x_{29} - kf_{202}x_{31}x_9 + kf_{304}x_{37} \\
\dot{x}_{10} &= -kf_{12}x_{21}x_{10} + kf_{106}x_{26} \\
\dot{x}_{11} &= -kf_{13}x_{26}x_{11} + kf_{107}x_{28} \\
\dot{x}_{12} &= -kf_{15}x_{30}x_{12} + kf_{108}x_{32} \\
\dot{x}_{13} &= -kf_{16}x_{32}x_{13} + kf_{109}x_{35} \\
\dot{x}_{14} &= -kf_{14}x_{28}x_{14} + kf_{110}x_{30} + kf_{207}x_{31}x_{30} \\
\dot{x}_{15} &= -kf_{17}x_{35}x_{15} + kf_{111}x_{38} \\
\dot{x}_{16} &= -kf_{11}x_{29}x_{16} + kf_{112}x_{31} \\
\dot{x}_{17} &= +kf_{1a}x_1x_3 - kf_{1b}x_{17} - kf_{1c}x_{17} + kf_{1d}x_{19} \\
\dot{x}_{18} &= +kf_{2a}x_2x_4 - kf_{2b}x_{18} - kf_{2c}x_{18} + kf_{2d}x_{20} \\
\dot{x}_{19} &= +kf_{1c}x_{17} - kf_{1d}x_{19} - kf_{401}x_{19} \\
\dot{x}_{20} &= +kf_{2c}x_{18} - kf_{2d}x_{20} - kf_{403}x_{20} \\
\dot{x}_{21} &= +kf_3x_{19}x_5 + kf_4x_{20}x_5 - kf_{101}x_{21} \\
\dot{x}_{22} &= +kf_5x_{19}x_6 + kf_6x_{20}x_6 + kf_7x_{21}x_6 - kf_{102}x_{22} \\
\dot{x}_{23} &= +kf_{401}x_{19} - kf_{402}x_{23} \\
\dot{x}_{24} &= +kf_{403}x_{20} - kf_{404}x_{24}
\end{aligned}$$

$$\begin{aligned}
\dot{x}_{25} &= +kf_8x_{22}x_7 - kf_{103}x_{25} \\
\dot{x}_{26} &= +kf_{12}x_{21}x_{10} - kf_{106}x_{26} \\
\dot{x}_{27} &= +kf_9x_{25}x_8 - kf_{104}x_{27} \\
\dot{x}_{28} &= +kf_{13}x_{26}x_{11} - kf_{107}x_{28} \\
\dot{x}_{29} &= +kf_{10}x_{27}x_9 - kf_{105}x_{29} \\
\dot{x}_{30} &= +kf_{14}x_{28}x_{14} - kf_{110}x_{30} - kf_{207}x_{31}x_{30} \\
\dot{x}_{31} &= +kf_{11}x_{29}x_{16} - kf_{112}x_{31} \\
\dot{x}_{32} &= +kf_{15}x_{30}x_{12} - kf_{108}x_{32} \\
\dot{x}_{33} &= +kf_{204}x_{30}x_8 - kf_{303}x_{33} \\
\dot{x}_{34} &= +kf_{208}x_{30}x_5 + kf_{206}x_{31}x_5 - kf_{301}x_{34} + kf_{203}x_{38}x_5 \\
\dot{x}_{35} &= +kf_{16}x_{32}x_{13} - kf_{109}x_{35} \\
\dot{x}_{36} &= +kf_{201}x_{31}x_6 - kf_{302}x_{36} \\
\dot{x}_{37} &= +kf_{202}x_{31}x_9 - kf_{304}x_{37} \\
\dot{x}_{38} &= +kf_{17}x_{35}x_{15} - kf_{111}x_{38}
\end{aligned}$$
